# Supplementary material
Source: HighWire-hosted journal article supplement (http://d2538ggaoe6cji.cloudfront.net/highwire/filestream/45076/field_highwire_adjunct_files/2/151662-3.pdf)

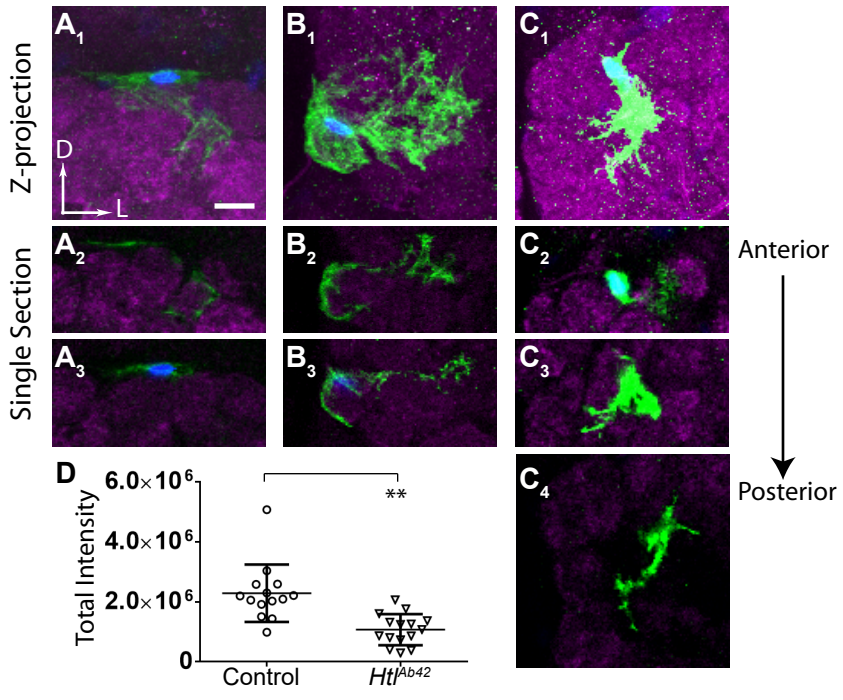

Supplement: 151662-3.pdf [file 151662-3.pdf]
